# Supplementary material
Source: MDPI journal article supplement (https://www.mdpi.com/2073-4441/14/17/2670)
Supplement: s1 [file s1]

Article

# The Emergent Integrated Constructed Wetland-Reservoir (CW-R) Is Being Challenged by 2-Methylisoborneol Episode—A Case Study in Yanlonghu CW-R

Xiao Ren <sup>1,2</sup>, Jiaxin Sun <sup>1</sup>, Qi Zhang <sup>1</sup>, Yanxia Zuo <sup>1</sup>, Jin Liu <sup>1</sup>, Jiashou Liu <sup>1</sup>, Lin Li <sup>1,\*</sup> and Lirong Song <sup>1,\*</sup>

<sup>1</sup> State Key Laboratory of Freshwater Ecology and Biotechnology, Institute of Hydrobiology, Chinese Academy of Sciences, Wuhan 430072, China

<sup>2</sup> University of Chinese Academy of Sciences, Beijing 100049, China

\* Correspondence: lilin@ihb.ac.cn (L.L.); lrsong@ihb.ac.cn (L.S.)

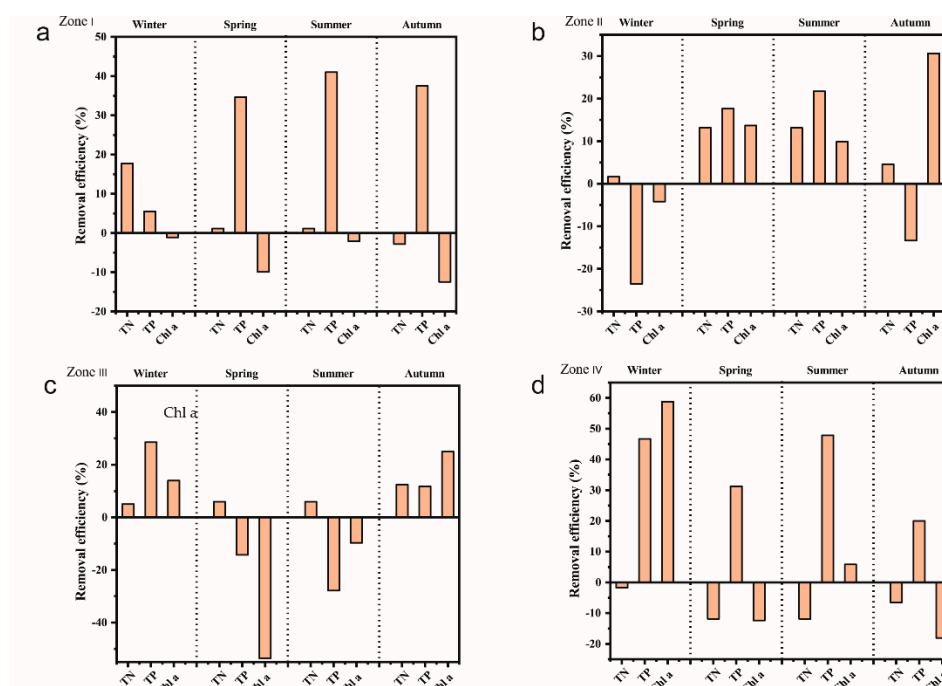

**Figure S1.** Variations of reduction efficiency of nutrients and Chl a in four treatment zones, a: Zone I; b: Zone II; c: Zone III; d: Zone IV. Variables: TN (total nitrogen), TP (total phosphorus) and Chl a (Chlorophyll a), from left to right.

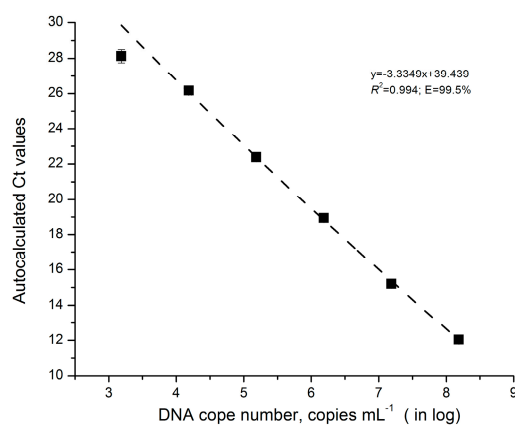

**Figure S2.** Standard curves for qPCR assays with tenfold serial diluted linear plasmid which cloned the mic fragment. Primer sets MIB-R(f/r), and Ctaq were used for SYBR Green. E value: efficiency of amplification.

**Table S1.** The Shannon wiener diversity index and evenness index of Yanlonghu CW-R in four seasons.

| Seasons | Shannon Wiener diversity index ( $H'$ ) | Evenness index ( $J$ ) |
|---------|-----------------------------------------|------------------------|
| Winter  | 1.57                                    | 0.28                   |
| Spring  | 2.30                                    | 0.41                   |
| Summer  | 1.68                                    | 0.30                   |
| Autumn  | 2.00                                    | 0.35                   |
